# Supplementary material for: Deficiency in RCAT-1 Function Causes Dopamine Metabolism Related Behavioral Disorders in Caenorhabditis elegans
Source: MDPI journal article supplement (doi:10.3390/ijms23042393), 2022-02-21
Supplement: s1 [file s1]

## Supplementary Materials

**Video S1. Movement of N2 wildtype.** The arrow indicates the location of the nematode at the beginning of the video. Video was recorded by an Olympus SZX7 zoom stereo microscope.

**Video S2. Movement of *R02D3.7(ok1745)*.** The arrow indicates the location of the nematode at the beginning of the video. Video was recorded by an Olympus SZX7 zoom stereo microscope.

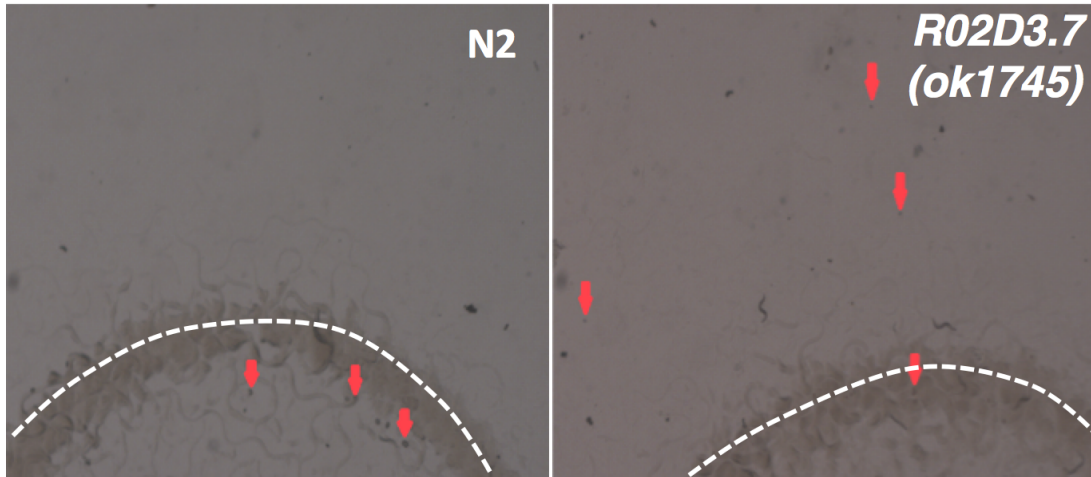

**Figure S1. Egg laying pattern of *R02D3.7(ok1745)*.** *R02D3.7(ok1745)* strain lays egg outside of seeded food unlike the wild-type animals that lay inside of seeded food.

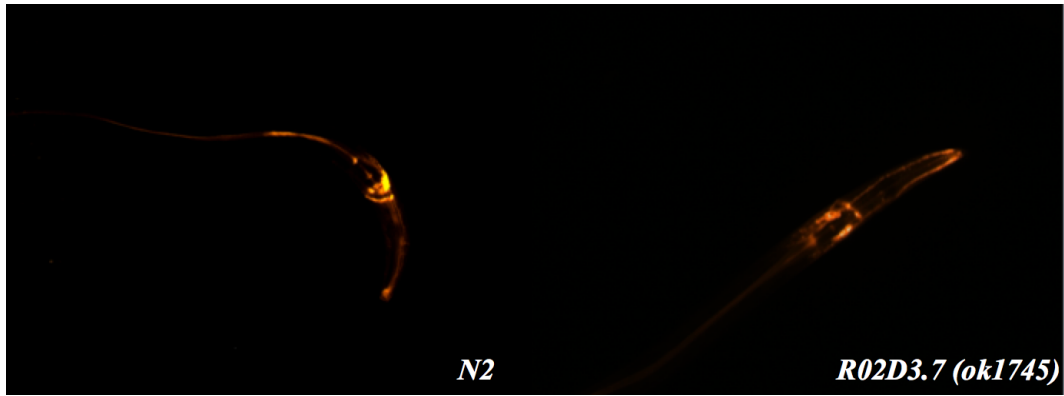

**Figure S2. DiI staining of the wild-type animals and *R02D3.7 (ok1745)* strain.** Staining of chemosensory neurons was performed on both strains. *R02D3.7 (ok1745)* was stained normally as the wild-type N2 animals. This indicates that *R02D3.7 (ok1745)* has no structural defects in chemosensory neurons.

### ***bas-1***

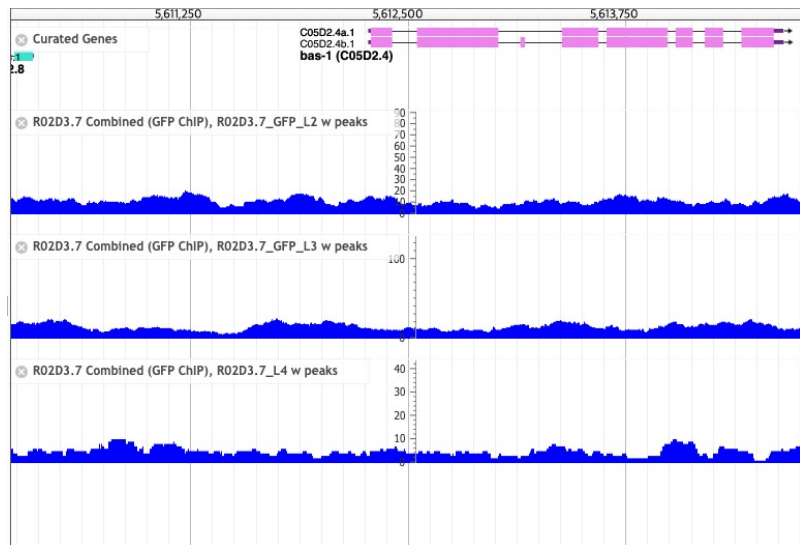

### ***dat-1***

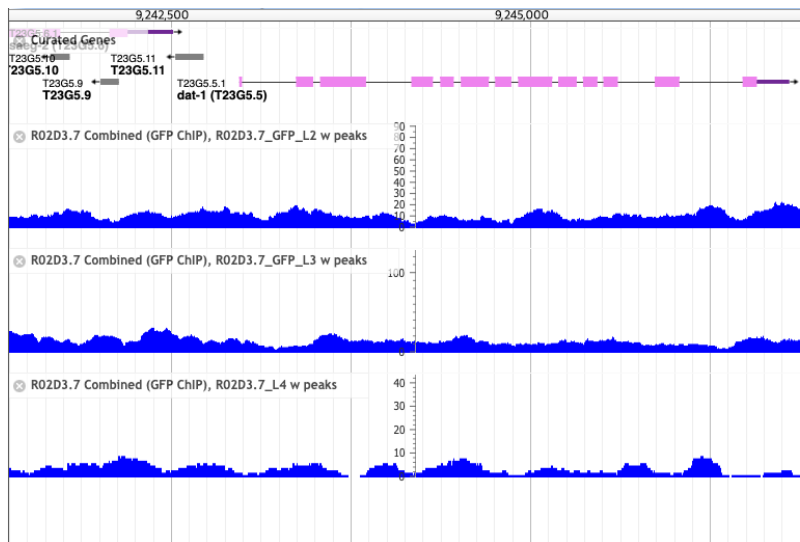

**Figure S3. *bas-1* and *dat-1* genes did not bind with R02D3.7.** Illustration is driven from wormbase JBrowse([www.wormbase.org](http://www.wormbase.org)), based on ChIP-seq data analysis from modENCODE database.

**Table S1.** Nucleotide sequence of primers used in qRT-PCR

| Target Gene   | Primer Sequence                                                            |
|---------------|----------------------------------------------------------------------------|
| <i>act-1</i>  | (Forward) GTATGGAGTCCGCCGA<br>(Reverse) CTTTCATGGTTGATGGGGCAA              |
| <i>mec-4</i>  | (Forward) TCAGGGAATGACAGATGAAGTTGC<br>(Reverse) ACATGGGACCTGCTCGAATACTAG   |
| <i>mec-8</i>  | (Forward) GCCAGAAAAATGTTGCAAGGTGTC<br>(Reverse) AATGTTGGAGGCTGGCTGCTG      |
| <i>mec-10</i> | (Forward) GGAACATGACAGATGAAGTTGCCA<br>(Reverse) CAAGCCATATTGTGGTCCAGCTC    |
| <i>myo-3</i>  | (Forward) CCAGAAGATGGATTTCGTCGCC<br>(Reverse) CACAGAAAAGTCCGGAGTATGTGT     |
| <i>unc-22</i> | (Forward) GTCGTTGAGAACGAACTGCAATC<br>(Reverse) CGAAGTGACCAACAGTTTGACGT     |
| <i>unc-54</i> | (Forward) AAGGTTATCGCCAAGCTCGAAC<br>(Reverse) GTTCCTCAGCTTCCTCAACCTG       |
| <i>cat-1</i>  | (Forward) CTTGCTCTCTTCGATGGATCAA<br>(Reverse) ATTTCCGATGGTGATTGCTCCT       |
| <i>cat-2</i>  | (Forward) ATTTGAAAATTCTCCAAGAGG<br>(Reverse) ATGTCTCAAATACGTAGTTGT         |
| <i>bas-1</i>  | (Forward) AACTTTTATGAAATGGGTCTC<br>(Reverse) TCAGAGCAATACATGACAAAT         |
| <i>dat-1</i>  | (Forward) CGTACTCGGCTACATGTCCTGCAA<br>(Reverse) CTGAAAGGCCCGGTGATGATAGCTTC |
| <i>ast-1</i>  | (Forward) AATGATCACTTCACCGGTATGAAC<br>(Reverse) ACGTCACTTTTGCTTTCGGTACTT   |
